# Supplementary material
Source: HighWire-hosted journal article supplement (https://gut.bmj.com/content/69/8/1423)

Supplementary Figure 1

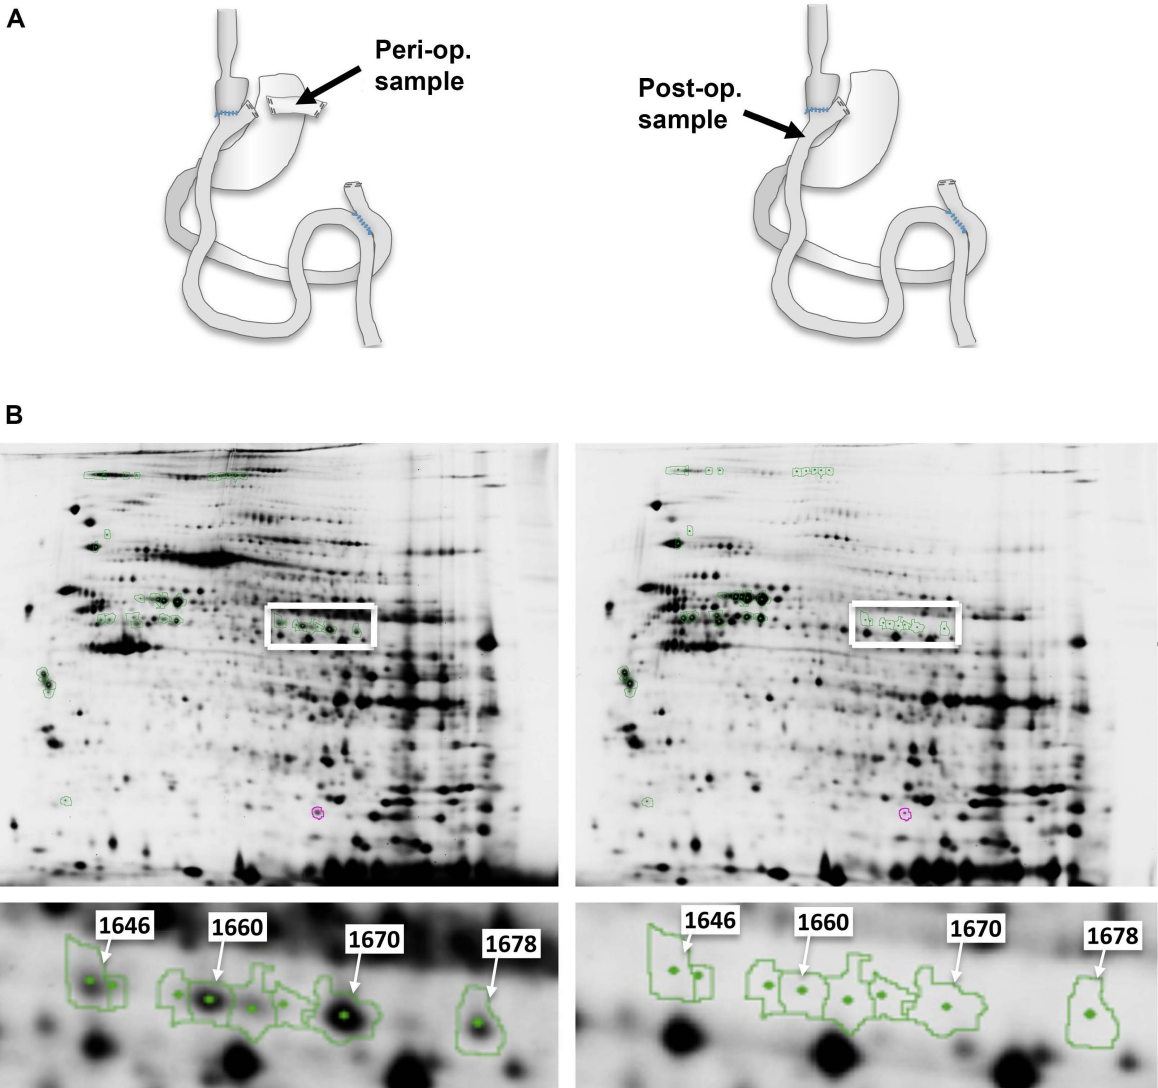

Supplement: inline-supplementary-material-1 [file inline-supplementary-material-1.pdf]
