# Supplementary material
Source: HighWire-hosted journal article supplement (https://gut.bmj.com/content/69/8/1423)
Supplement: inline-supplementary-material-2 [file inline-supplementary-material-2.pdf]

**Supplementary Table 1.** Primary and secondary antibodies used for Western blotting and immunofluorescence.

| Primary antibody                 | Manufacturer      | Catalog number | Application                         |
|----------------------------------|-------------------|----------------|-------------------------------------|
| mHMGCS                           | Santa Cruz Bio.   | sc-33828       | Western blot and immunofluorescence |
| CPT1A                            | Abcam             | ab128568       | Western blot                        |
| FATP4                            | Atlas Antibodies  | HPA007293      | Western blot                        |
| DGAT1                            | Santa Cruz Bio.   | sc-271934      | Western blot                        |
| SCOT                             | Santa Cruz Bio.   | sc-133988      | Western blot                        |
| GAPDH                            | Imgenex           | IMG-5143A      | Western blot                        |
| GAPDH                            | Novus Biologicals | NB100-56875    | Western blot                        |
| Secondary antibody               | Manufacturer      | Catalog number | Application                         |
| Goat anti-rabbit IgG-AP          | Santa Cruz Bio.   | sc-2007        | Western blot                        |
| Anti-mouse IgG HRP-linked        | Cell Signaling    | 7076           | Western blot                        |
| Anti-rabbit IgG HRP-linked       | Cell Signaling    | 7074           | Western blot                        |
| Alexa Fluor 488 goat anti-rabbit | ThermoFisher Sci. | A11008         | Immunofluorescence                  |
