# Supplementary material
Source: HighWire-hosted journal article supplement (https://gut.bmj.com/content/69/8/1423)
Supplement: inline-supplementary-material-3 [file inline-supplementary-material-3.pdf]

**Supplementary Table 2.** Paired analysis of 2D-gels peri- and 6 to 8 months postoperatively and identification of corresponding proteins with tandem mass spectrometry.

| Spot Id. | Spot cluster Id. | Accession number <sup>a)</sup> | Gene/Protein designation | Protein description                               | Protein score <sup>b)</sup> | Change | Paired t-test |
|----------|------------------|--------------------------------|--------------------------|---------------------------------------------------|-----------------------------|--------|---------------|
| 2838     | 8                | Q01995                         | TAGLN                    | Transgelin                                        | 611                         | -2.4   | <0.001        |
| 2754     | 7                | P30626                         | SRI                      | Sorcin                                            | 301                         | -1.6   | 0.018         |
| 2093     | 6                | P09493                         | TPM1                     | Tropomyosin alpha-1 chain                         | 852                         | -1.6   | 0.013         |
| 2050     | 6                | P09493                         | TPM1                     | Tropomyosin alpha-1 chain                         | 1338                        | -1.6   | 0.010         |
| 1988     | 6                | P07951                         | TPM2                     | Tropomyosin beta chain                            | 1121                        | -1.6   | 0.024         |
| 1678     | 5                | P54868                         | mHMGCS                   | Hydroxymethylglutaryl-CoA synthase, mitochondrial | 558                         | -3.6   | <0.001        |
| 1670     | 5                | P41240                         | mHMGCS                   | Hydroxymethylglutaryl-CoA synthase, mitochondrial | 577                         | -3.6   | <0.001        |
| 1661     | 5                | P41240                         | mHMGCS                   | Hydroxymethylglutaryl-CoA synthase, mitochondrial | 530                         | -2.2   | <0.001        |
| 1660     | 5                | P54868                         | mHMGCS                   | Hydroxymethylglutaryl-CoA synthase, mitochondrial | 652                         | -4.0   | <0.001        |
| 1646     | 4                | P05783                         | KRT18                    | Keratin, type I cytoskeletal 18                   | 673                         | -2.2   | <0.001        |
| 1640     | 4                | P05783                         | KRT18                    | Keratin, type 1 cytoskeletal 18                   | 1029                        | +1.9   | 0.008         |
| 1627     | 4                | P35900                         | KRT20                    | Keratin, type I cytoskeletal 20                   | 1852                        | +2.0   | 0.004         |
| 1606     | 4                | P35900                         | KRT20                    | Keratin, type I cytoskeletal 20                   | 1539                        | +1.7   | 0.011         |
| 1605     | 4                | P05787                         | KRT8                     | Keratin, type II cytoskeletal 8                   | 1226                        | +2.0   | 0.033         |
| 1603     | 4                | P05787                         | KRT8                     | Keratin, type II cytoskeletal 8                   | 1166                        | +1.8   | 0.027         |
| 1594     | 4                | P05787                         | KRT8                     | Keratin, type II cytoskeletal 8                   | 1324                        | +1.9   | 0.032         |
| 1459     | 4                | P05787                         | KRT8                     | Keratin, type II cytoskeletal 8                   | 2026                        | +1.9   | 0.002         |
| 1441     | 4                | P05787                         | KRT8                     | Keratin, type II cytoskeletal 8                   | 1872                        | +2.1   | 0.003         |
| 1432     | 4                | P05787                         | KRT8                     | Keratin, type II cytoskeletal 8                   | 1942                        | +1.7   | 0.038         |
| 1427     | 4                | P05787                         | KRT8                     | Keratin, type II cytoskeletal 8                   | 1567                        | +2.2   | 0.004         |
| 1421     | 4                | P05787                         | KRT8                     | Keratin, type II cytoskeletal 8                   | 1675                        | +2.0   | 0.015         |
| 935      | 3                | P08238                         | HSP90AB1                 | Heat shock protein HSP 90-β                       | 450                         | -1.6   | 0.006         |
| 478      | 1                | P12109                         | COL6A1                   | Collagen alpha-1(VI) chain                        | 701                         | -1.7   | 0.002         |
| 469      | 1                | P12109                         | COL6A1                   | Collagen alpha-1(VI) chain                        | 797                         | -1.9   | 0.004         |
| 431      | 2                | P18206                         | VCL                      | Vinculin                                          | 884                         | -1.7   | 0.021         |
| 420      | 2                | P18206                         | VCL                      | Vinculin                                          | 1100                        | -1.8   | 0.010         |
| 416      | 2                | P18206                         | VCL                      | Vinculin                                          | 1018                        | -1.7   | 0.018         |

a) Accession number in Uniprot database

b) Protein match score in Mascot search results
